# Supplementary material
Source: publisher site journal article supplement (https://www.dovepress.com/article/322034)
Supplement: Supplementary file 1 [file get_supplementary_file.php]

**Supplementary materials**

**Table S1 Characteristics background of patients with clinical symptoms of suspected allergic diseases in different genders from February to June between 2017 and 2020 in south China**

|  |  | 2017 |  | 2018 |  | 2019 |  | 2020 |  | p-value |
| --- | --- | --- | --- | --- | --- | --- | --- | --- | --- | --- |
|  |  | total | (%) | total | (%) | total | (%) | total | (%) |  |
| d1 | male | 775 | 46 | 1035 | 49 | 1124 | 48 | 469 | 64 | <0·001 |
|  | female | 482 | 45 | 590 | 42 | 687 | 43 | 307 | 53 | 0·012 |
| d2 | male | 223 | 64 | 407 | 59 | 402 | 67 | 240 | 75 | 0·001 |
|  | female | 164 | 52 | 269 | 50 | 311 | 51 | 169 | 64 | 0·016 |
| i6 | male | 721 | 16 | 887 | 17 | 1067 | 17 | 420 | 30 | <0·001 |
|  | female | 420 | 16 | 480 | 15 | 658 | 16 | 265 | 23 | 0·038 |
| e5 | male | 547 | 5 | 751 | 7 | 777 | 3 | 215 | 10 | 0·001 |
|  | female | 310 | 4 | 385 | 5 | 464 | 4 | 126 | 13 | 0·001 |
| f1 | male | 580 | 25 | 835 | 25 | 936 | 23 | 203 | 27 | 0·547 |
|  | female | 343 | 24 | 442 | 24 | 505 | 19 | 102 | 32 | 0·010 |
| f2 | male | 584 | 34 | 847 | 35 | 924 | 35 | 192 | 28 | 0·221 |
|  | female | 341 | 35 | 450 | 32 | 494 | 29 | 101 | 37 | 0·300 |
| f14 | male | 154 | 3 | 259 | 3 | 274 | 5 | 130 | 8 | 0·122 |
|  | female | 115 | 4 | 144 | 4 | 190 | 4 | 11 | 36 | 0·988 |
| f24 | male | 631 | 13 | 847 | 15 | 992 | 12 | 308 | 21 | 0·001 |
|  | female | 380 | 12 | 448 | 11 | 601 | 10 | 200 | 17 | 0·100 |
| tIgE | male | 1598 | 48 | 2235 | 47 | 2464 | 46 | 1370 | 55 | <0·001 |
|  | female | 1139 | 39 | 1539 | 37 | 1850 | 35 | 1001 | 45 | <0·001 |

**Notes:**

1. P-value for Chi-square test or Fisher exact test;
2. significant difference: P<0.05;
3. **Abbreviations:** d1, *Dermatophagoides pteronyssinus*; d2, *Dermatophagoides farina*; i6, German cockroach; e5, dog dander; f1, egg white; f2, milk; f14, soya bean; f24, shrimp; tIgE, total immunoglobulin E

**Table S2 Characteristics background of patients with clinical symptoms of suspected allergic diseases in different age groups from February to June between 2017 and 2020 in south China**

|  |  | **2017** |  | **2018** |  | **2019** |  | **2020** |  |  |
| --- | --- | --- | --- | --- | --- | --- | --- | --- | --- | --- |
|  |  | total | (%) | total | (%) | total | (%) | total | (%) | p-value |
| d1 | 0-5 | 618 | 39 | 846 | 35 | 847 | 35 | 188 | 48 | 0·004 |
|  | 6-17 | 262 | 74 | 359 | 78 | 449 | 73 | 236 | 85 | 0·004 |
|  | >17 | 377 | 37 | 420 | 41 | 515 | 40 | 352 | 49 | 0·004 |
| d2 | 0-5 | 159 | 44 | 279 | 43 | 180 | 47 | 58 | 59 | 0·190 |
|  | 6-17 | 108 | 85 | 206 | 74 | 218 | 83 | 151 | 89 | 0·003 |
|  | >17 | 120 | 55 | 191 | 54 | 315 | 51 | 200 | 61 | 0·203 |
| i6 | 0-5 | 554 | 8 | 714 | 7 | 798 | 7 | 159 | 8 | 0·671 |
|  | 6-17 | 242 | 24 | 302 | 25 | 434 | 21 | 212 | 32 | 0·034 |
|  | >17 | 345 | 22 | 351 | 28 | 493 | 28 | 314 | 34 | 0·010 |
| e5 | 0-5 | 532 | 3 | 715 | 3 | 764 | 2 | 142 | 4 | 0·265 |
|  | 6-17 | 176 | 9 | 272 | 13 | 329 | 6 | 115 | 17 | 0·002 |
|  | >17 | 149 | 5 | 149 | 7 | 148 | 7 | 84 | 14 | 0·091 |
| f1 | 0-5 | 678 | 28 | 953 | 27 | 1013 | 26 | 166 | 34 | 0·154 |
|  | 6-17 | 187 | 17 | 255 | 20 | 351 | 11 | 114 | 23 | 0·003 |
|  | >17 | 58 | 5 | 69 | 4 | 77 | 9 | 25 | 16 | 0·296 |
| f2 | 0-5 | 682 | 42 | 966 | 4 | 1015 | 41 | 168 | 40 | 0·796 |
|  | 6-17 | 188 | 13 | 258 | 20 | 351 | 13 | 113 | 19 | 0·069 |
|  | >17 | 55 | 0 | 73 | 1 | 52 | 4 | 12 | 17 | 0·159 |
| f14 | 0-5 | 55 | 0 | 140 | 3 | 100 | 6 | 7 | 0 | 0·524 |
|  | 6-17 | 17 | 18 | 25 | 4 | 21 | 10 | 10 | 10 | 0·601 |
|  | >17 | 197 | 3 | 238 | 4 | 343 | 4 | 227 | 6 | 0·524 |
| f24 | 0-5 | 496 | 6 | 716 | 7 | 854 | 5 | 144 | 9 | 0·155 |
|  | 6-17 | 176 | 18 | 240 | 24 | 343 | 15 | 119 | 21 | 0·048 |
|  | >17 | 339 | 21 | 339 | 21 | 396 | 22 | 245 | 24 | 0·694 |
| tIgE | 0-5 | 955 | 42 | 1233 | 35 | 1323 | 37 | 345 | 54 | <0·001 |
|  | 6-17 | 330 | 66 | 461 | 66 | 604 | 63 | 349 | 74 | 0·004 |
|  | >17 | 1452 | 41 | 2080 | 43 | 2387 | 39 | 1677 | 46 | <0·001 |

**Notes:**

1. P-value for Chi-square test or Fisher exact test;
2. significant difference: P<0.05;
3. **Abbreviations:** d1, *Dermatophagoides pteronyssinus*; d2, *Dermatophagoides farina*; i6, German cockroach; e5, dog dander; f1, egg white; f2, milk; f14, soya bean; f24, shrimp; tIgE, total immunoglobulin E

**Figure S1: The ratio of allergic patients with a higher indoor inhalant allergen content (Class 1-3) to those with a lower indoor inhalant** **allergen content (Class 4-6) from February to June between 2017 and 2020 in south China.**

**
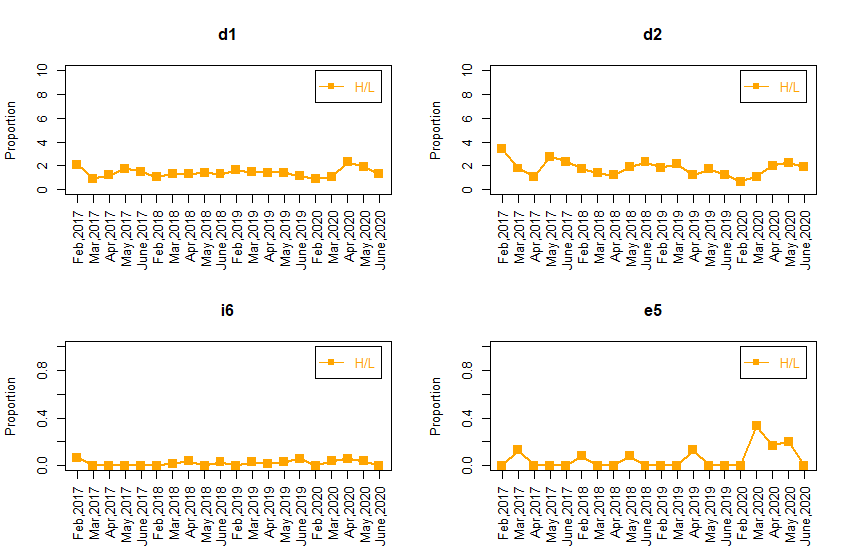
**

**Legends: H:Class 4-6; L:Class 1-3; d1, *Dermatophagoides pteronyssinus*; d2, Dermatophagoides farina; i6, German cockroach; e5, dog dander**

**Figure S2: The ratio of allergic patients with a higher food allergen content (Class 1-3) to those with a lower food allergen content (Class 4-6) from February to June between 2017 and 2020 in south China.**

**
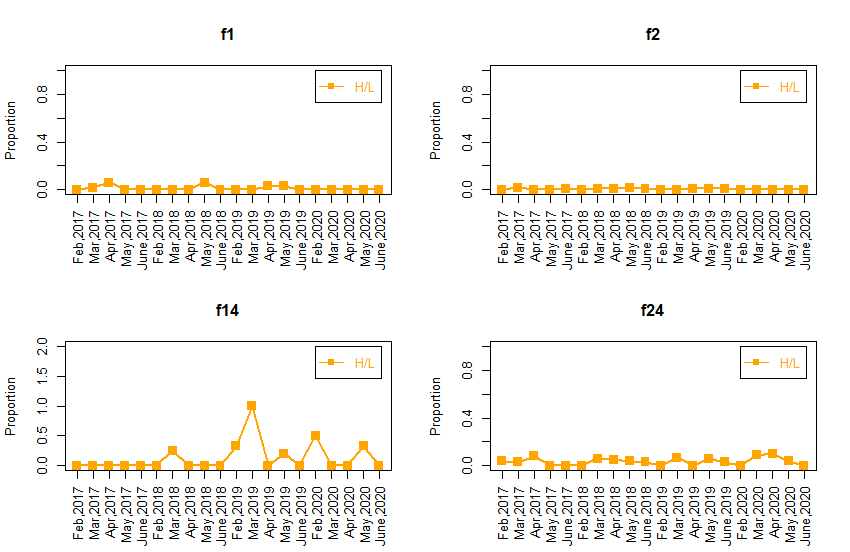
**

**Legends: H:Class 4-6; L:Class 1-3; f1, egg white; f2, milk; f14, soya bean; f24, shrimp**
